# Supplementary material for: Protein Kinase D2 drives chylomicron‐mediated lipid transport in the intestine and promotes obesity
Source: PubMed Central journal article supplement (PMC8103097; doi:10.15252/emmm.202013548), 2021-05-05
Supplement: EMMM-13-e13548-s001.pdf [file EMMM-13-e13548-s001.pdf]

## Expanded View Figures

### Figure EV1. Inactivation of PKD2 does not affect adipose tissue or liver function but increases pancreatic islets size - Related to Fig 1.

- A Relative expression of specified genes in SubWAT of *Pkd2<sup>w<sup>t</sup>/w<sup>t</sup></sup>* and *Pkd2<sup>ki/ki</sup>* male mice after 22 weeks in HFD. *n* = 6.
- B Representative pictures of H&E staining of liver of indicated male mice in panel (A).
- C, D Aspartate aminotransferase (C) and alanine aminotransferase (D) levels in serum of male mice in panel (A). *n* = 5.
- E Glucose-stimulated insulin secretion of *Pkd2<sup>w<sup>t</sup>/w<sup>t</sup></sup>* and *Pkd2<sup>ki/ki</sup>* male mice after 8 weeks in HFD. *n* = 8.
- F Representative pictures of immunofluorescent staining for insulin (red) and DAPI (blue) of *Pkd2<sup>w<sup>t</sup>/w<sup>t</sup></sup>* and *Pkd2<sup>ki/ki</sup>* male mice. *n* = 3. For each subject, three different sections of the pancreas were taken and a distance of 50  $\mu$ m was kept between the sections.
- G Mean fluorescence intensity (MFI) for insulin of mice in panel (F). Relative to *Pkd2<sup>w<sup>t</sup>/w<sup>t</sup></sup>*. *n* = 3. MFI was quantified from all the islets found in each of the three sections per experimental subject.
- H Islet area compared to pancreas area of mice in panel (F). Relative to *Pkd2<sup>w<sup>t</sup>/w<sup>t</sup></sup>*. All the islets found in each of the three sections per mouse were quantified.
- I Activity of *Pkd2<sup>w<sup>t</sup>/w<sup>t</sup></sup>* and *Pkd2<sup>ki/ki</sup>* male mice after 20 weeks in HFD. Expressed as counts per 12 h of intervals. *n* = 7 for *Pkd2<sup>w<sup>t</sup>/w<sup>t</sup></sup>* and *n* = 8 for *Pkd2<sup>ki/ki</sup>*.

Data information: Data presented as average  $\pm$  SEM, \**P*  $\leq$  0.05, \*\**P*  $\leq$  0.01. Significances were assessed by using a two-tailed Student's *t*-test for independent groups.

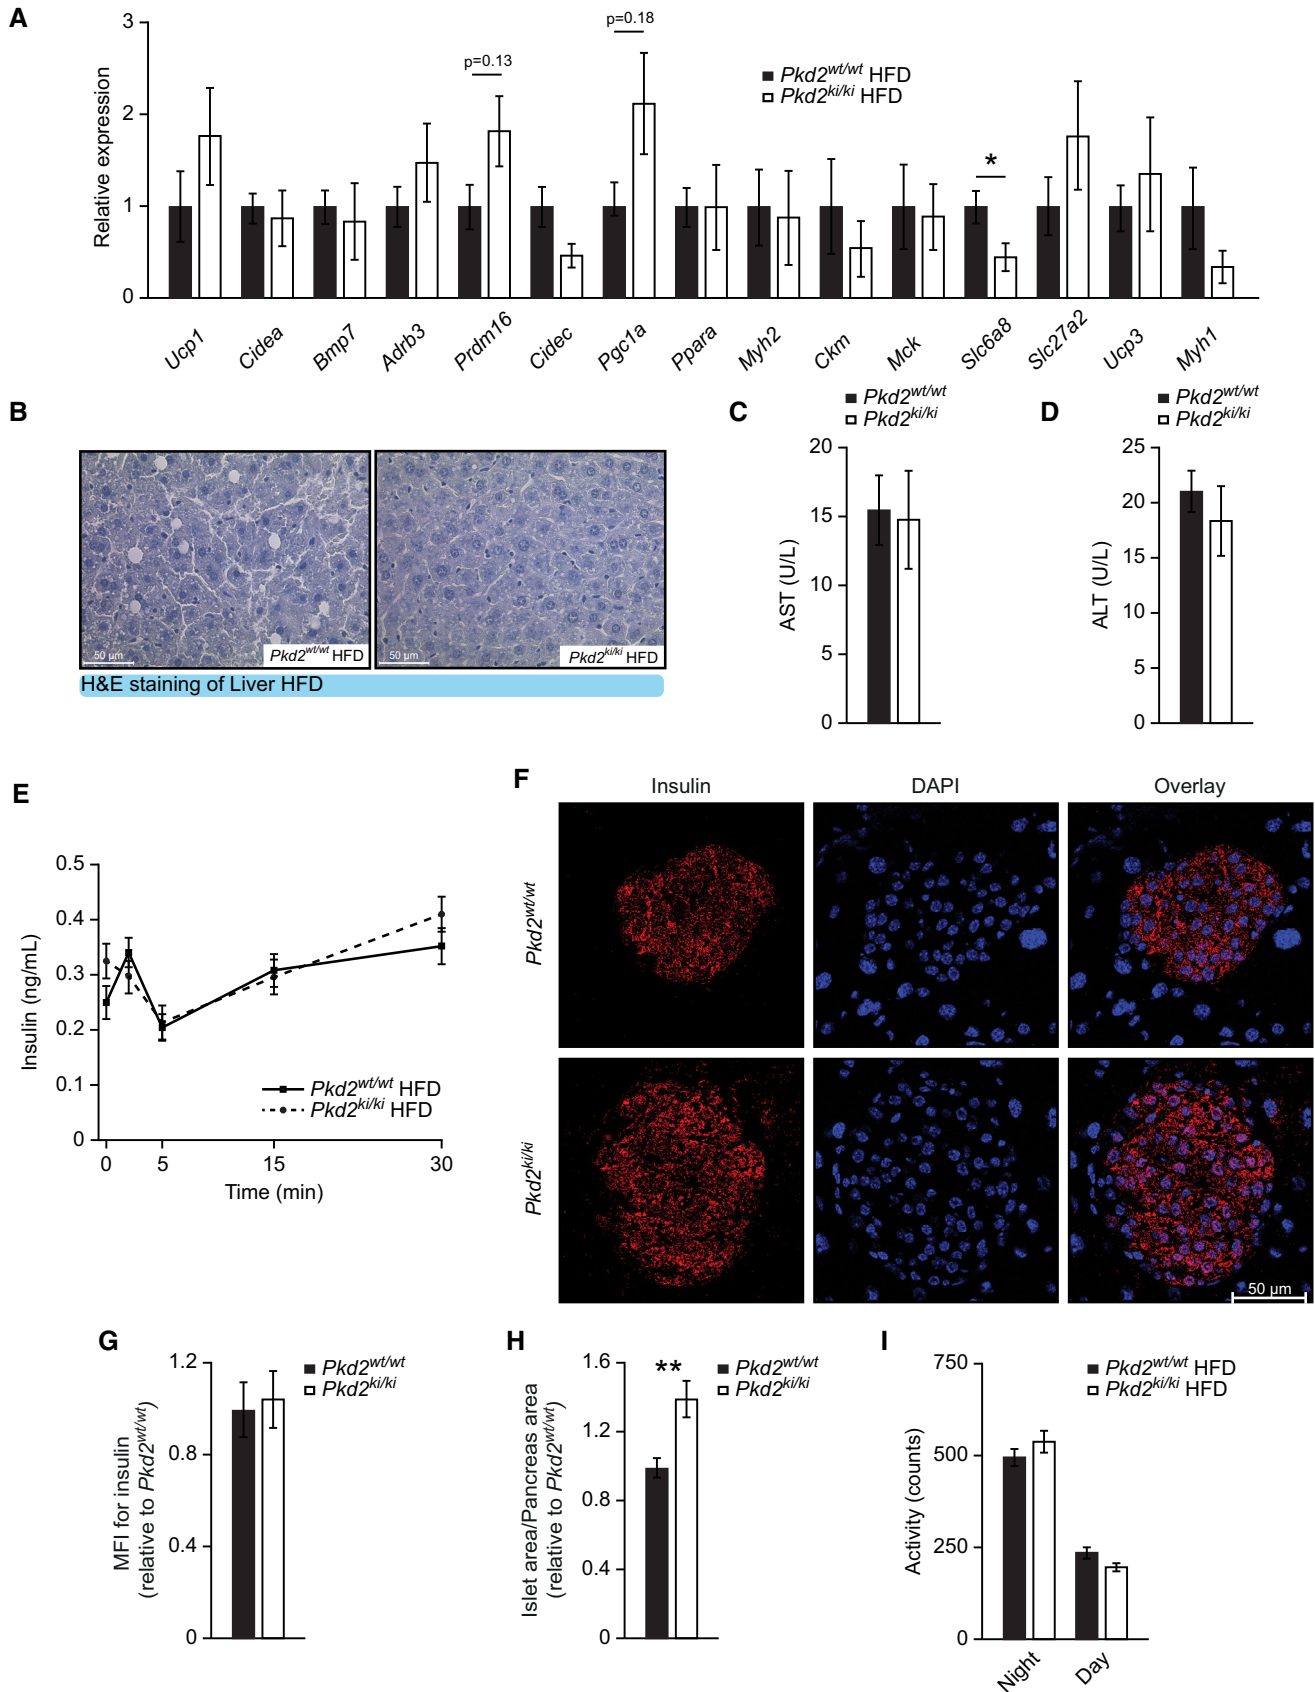

Figure EV1.

**Figure EV2. PKD2 does not regulate the expression of genes implicated in alimentary lipid processing in the intestine or the liver - Related to Fig 2.**

- A Weight of feces collected from *Pkd2*<sup>wt/wt</sup> and *Pkd2*<sup>ki/ki</sup> male mice fed normal diet per week. *n* = 6.
- B Pictures of feces from *Pkd2*<sup>wt/wt</sup> and *Pkd2*<sup>ki/ki</sup> male mice under normal diet. *n* = 6.
- C Western blot for pancreatic lipase in duodenum of *Pkd2*<sup>wt/wt</sup> and *Pkd2*<sup>ki/ki</sup> male mice 1 h after olive oil gavage. *n* = 6. The animals were dissected at the indicated time of the day.
- D Relative expression of specified genes in pancreas of *Pkd2*<sup>wt/wt</sup> and *Pkd2*<sup>ki/ki</sup> male mice. *n* = 6.
- E Relative expression of genes involved in bile acids production, metabolism, and transport in liver and ileum of male mice with indicated genotypes after 1 week of HFD. *n* = 6.
- F Relative expression of genes involved in fatty acid transport in jejunum of indicated male mice. *n* = 6.
- G *Pkd1* and *Pkd3* expression levels in duodenum and jejunum of male mice with indicated genotypes. *n* = 6.
- H Western blot analysis of protein kinase D1 (PKD1), protein kinase D2 (PKD2), and protein kinase D3 (PKD3) in small intestine of *Pkd2*<sup>wt/wt</sup> and *Pkd2*<sup>ki/ki</sup> male mice. *n* = 3.
- I Quantification of the Western blots from intestine samples in panel (H). *n* = 3.
- J Western blot analysis of protein kinase D2 (PKD2) and protein kinase D1 (PKD1) in Caco2 cells expressing *shscramble* or *shPkd2*. *n* = 3.
- K Quantification of the Western blots from Caco2 cells presented in panel (J). *n* = 3.

Data information: Data presented as average ± SEM, \**P* ≤ 0.05. Significances were assessed by using a two-tailed Student's *t*-test for independent groups.

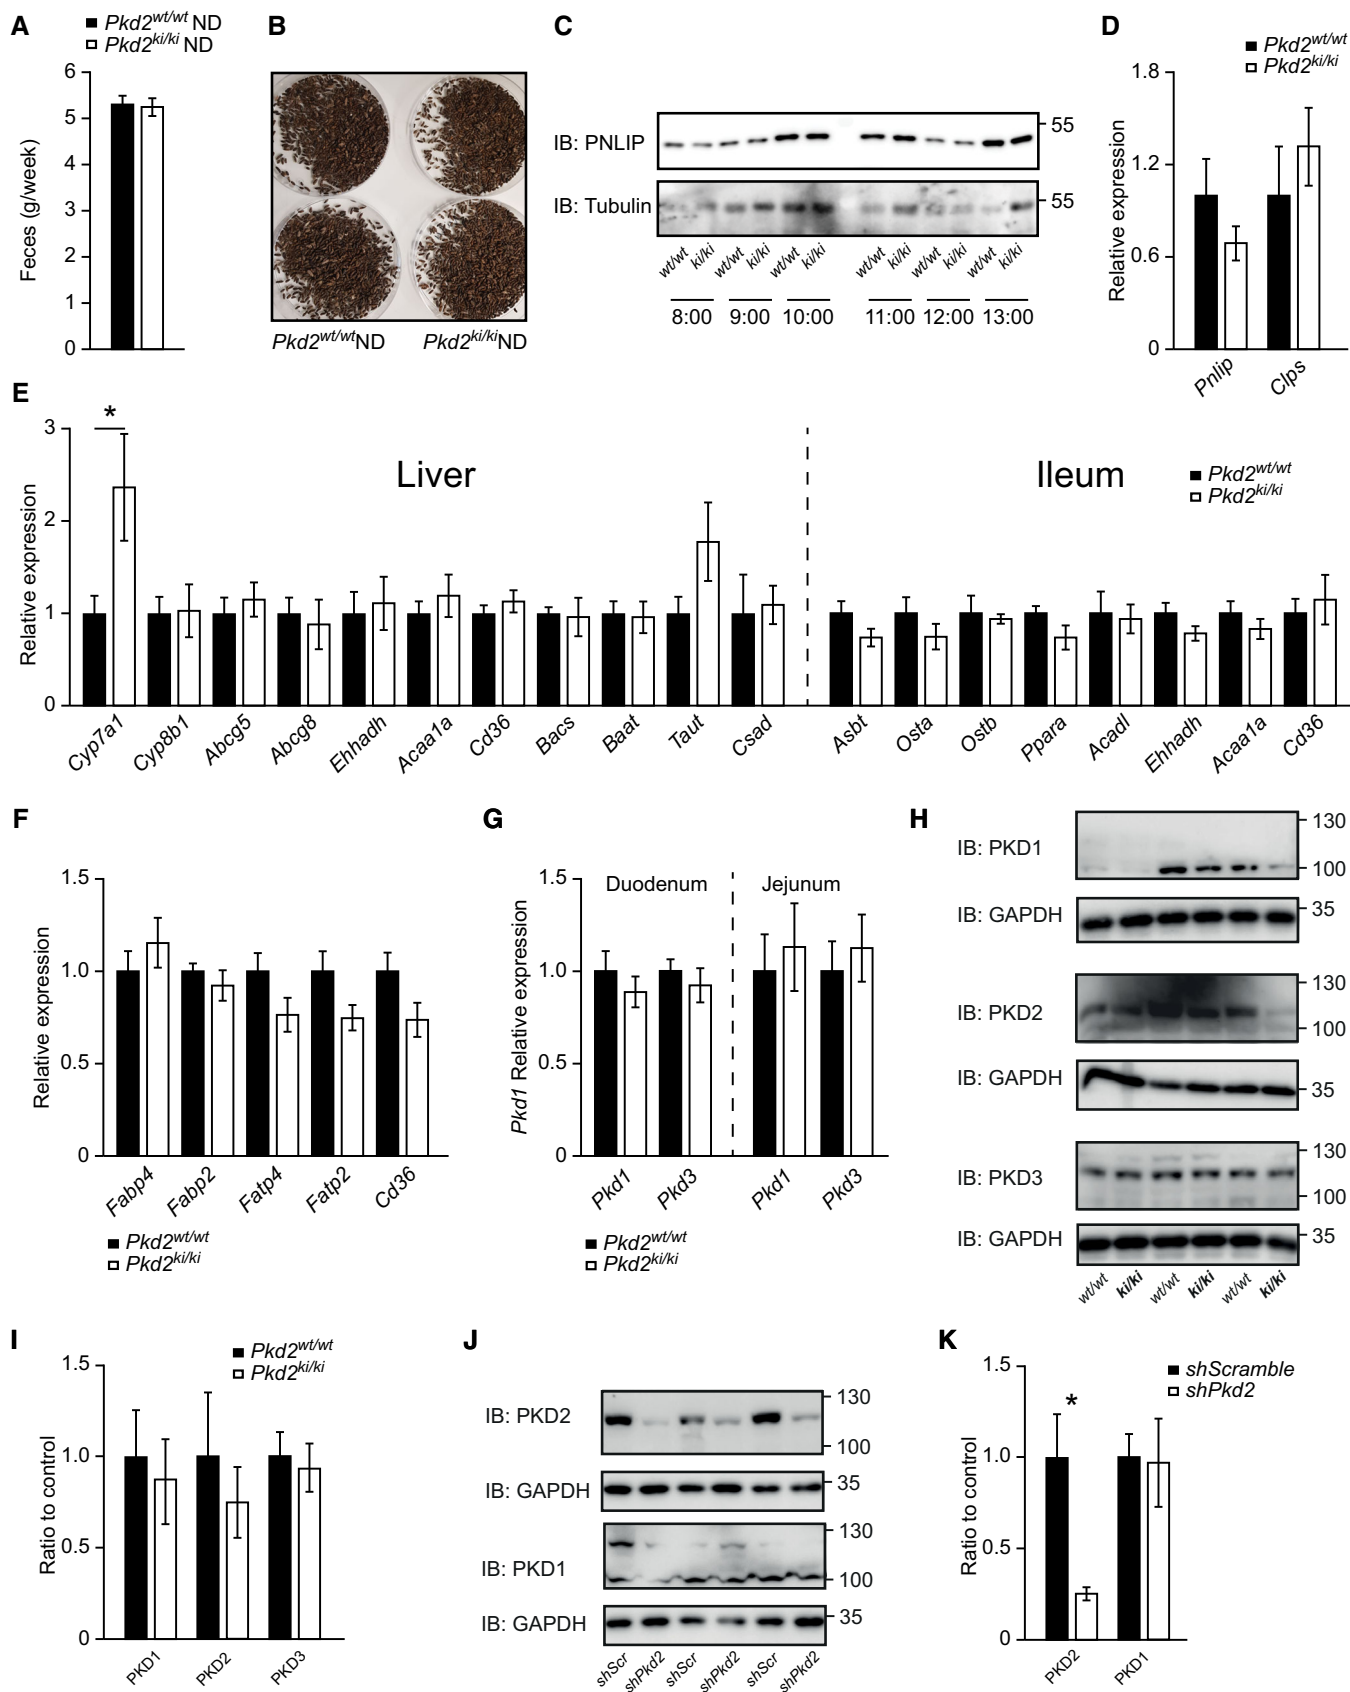

Figure EV2.

**Figure EV3. Inactivation of PKD2 does not affect the architecture, cellularity, or permeability of the intestine - Related to Fig 3.**

- A Representative pictures of H&E staining of jejunum of *Pkd2*<sup>wt/wt</sup> and *Pkd2*<sup>ki/ki</sup> male mice.
- B, C Confocal microscopy images of mice-derived organoids stained for E-cadherin, DAPI and villin (B), or chromogranin A (C).
- D Dextran concentration in serum after oral gavage of indicated male mice. *n* = 4
- E Length of small intestine of indicated male mice. *n* = 7 for *Pkd2*<sup>wt/wt</sup> and *n* = 8 for *Pkd2*<sup>ki/ki</sup>.
- F Western blot of PKD2 in Caco2 cell control (*shScramble*) and depleted from PKD2 by *shRNA* (sequence 1). *n* = 3.
- G Western blot of PKD2 in Caco2 cells expressing *shscramble* or *shPkd2* (sequence 2). Labeled as *shscramble*\* or *shPkd2*\*. *n* = 3.
- H Percentage of retention and uptake of <sup>14</sup>C-labeled fatty acids in Caco2 cells expressing *shscramble*\* or *shPkd2*\* (sequence 2) grown in a Transwell system for 14 days. *n* = 6.
- I Absolute mRNA quantification of *Pkd1*, *Pkd2*, and *Pkd3* in different parts of intestine of C57BL/6 mice. *n* = 4
- J Western blot of PKD3 in Caco2 cell control (*shScramble*) and depleted from PKD3 by *shRNA*. *n* = 2.
- K Percentage of release, uptake, and retention of <sup>14</sup>C-labeled fatty acids in Caco2 cells expressing *shscramble* or *shPkd3* grown in a Transwell system for 14 days. *n* = 5.

Data information: Data presented as average ± SEM. Significances were assessed by using a two-tailed Student's *t*-test for independent groups.

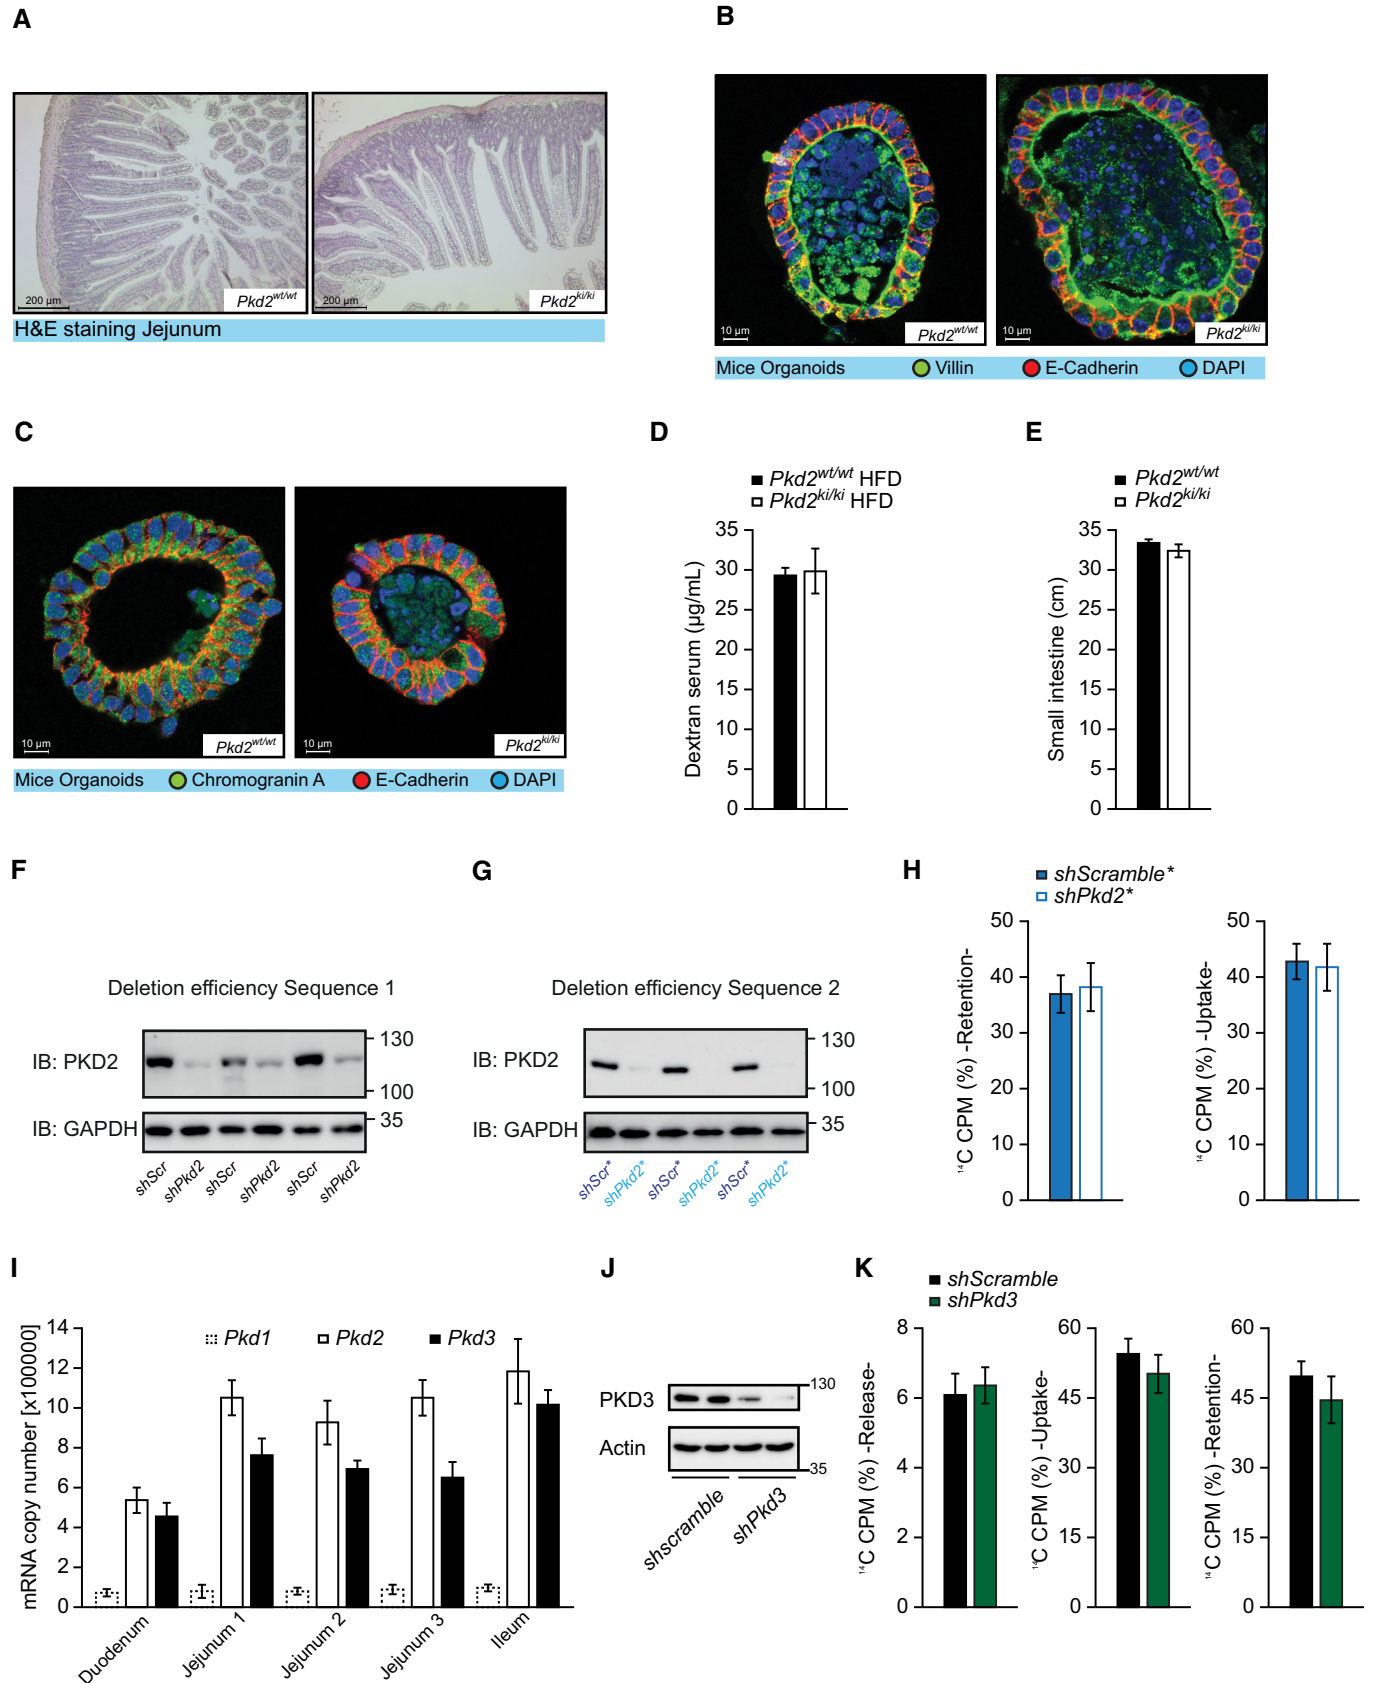

Figure EV3.

**Figure EV4. Deletion of PKD2 in the intestine does not affect neither food intake nor energy dissipation of the mice, and does not influence hepatic function nor the intestine architecture - Related to Figs 4 and 5.**

- A Relative expression of *Pkd2* in specified organs of *Pkd2<sup>fllox/fllox</sup>* and *Pkd2<sup>gut.A/A</sup>* male mice.  $n = 4$ .
- B Western blot of PKD2 in specified organs of *Pkd2<sup>fllox/fllox</sup>* and *Pkd2<sup>gut.A/A</sup>* mice.
- C, D Food intake (C) and energy expenditure (D) of *Pkd2<sup>fllox/fllox</sup>* and *Pkd2<sup>gut.A/A</sup>* male mice after 13 weeks in HFD.  $n = 4$ .
- E Length of small intestine of indicated male mice.  $n = 4$ .
- F, G Representative H&E pictures of jejunum (F) and liver (G) of male mice with indicated genotypes after 17 weeks in HFD.
- H MetaNMDs plots of bacterial composition show specific differences in small intestinal section.  $n = 7$ .
- I Pairwise PERMANOVA indicates no significant differences in compositions of jejunum and ileum.  $n = 7$ .
- J Beta diversity visualized by metaNMDs plots present differences in the microbial composition in duodenum and ileum & jejunum.  $n = 7$ .
- K Relative expression of genes involved in triglyceride and chylomicron synthesis in jejunum of *Pkd2<sup>wt/wt</sup>* and *Pkd2<sup>hi/hi</sup>* male mice after 1 week in HFD.  $n = 7$ .

Data information: Data presented as average  $\pm$  SEM, \* $P \leq 0.05$ , \*\* $P \leq 0.01$ , \*\*\* $P \leq 0.001$ . Significances in panels (A–E) were assessed by using a two-tailed Student's *t*-test for independent groups. In panels (I–K), statistical testing was performed using PERMANOVA with corrections for multiple testing using the Benjamini and Hochberg method.

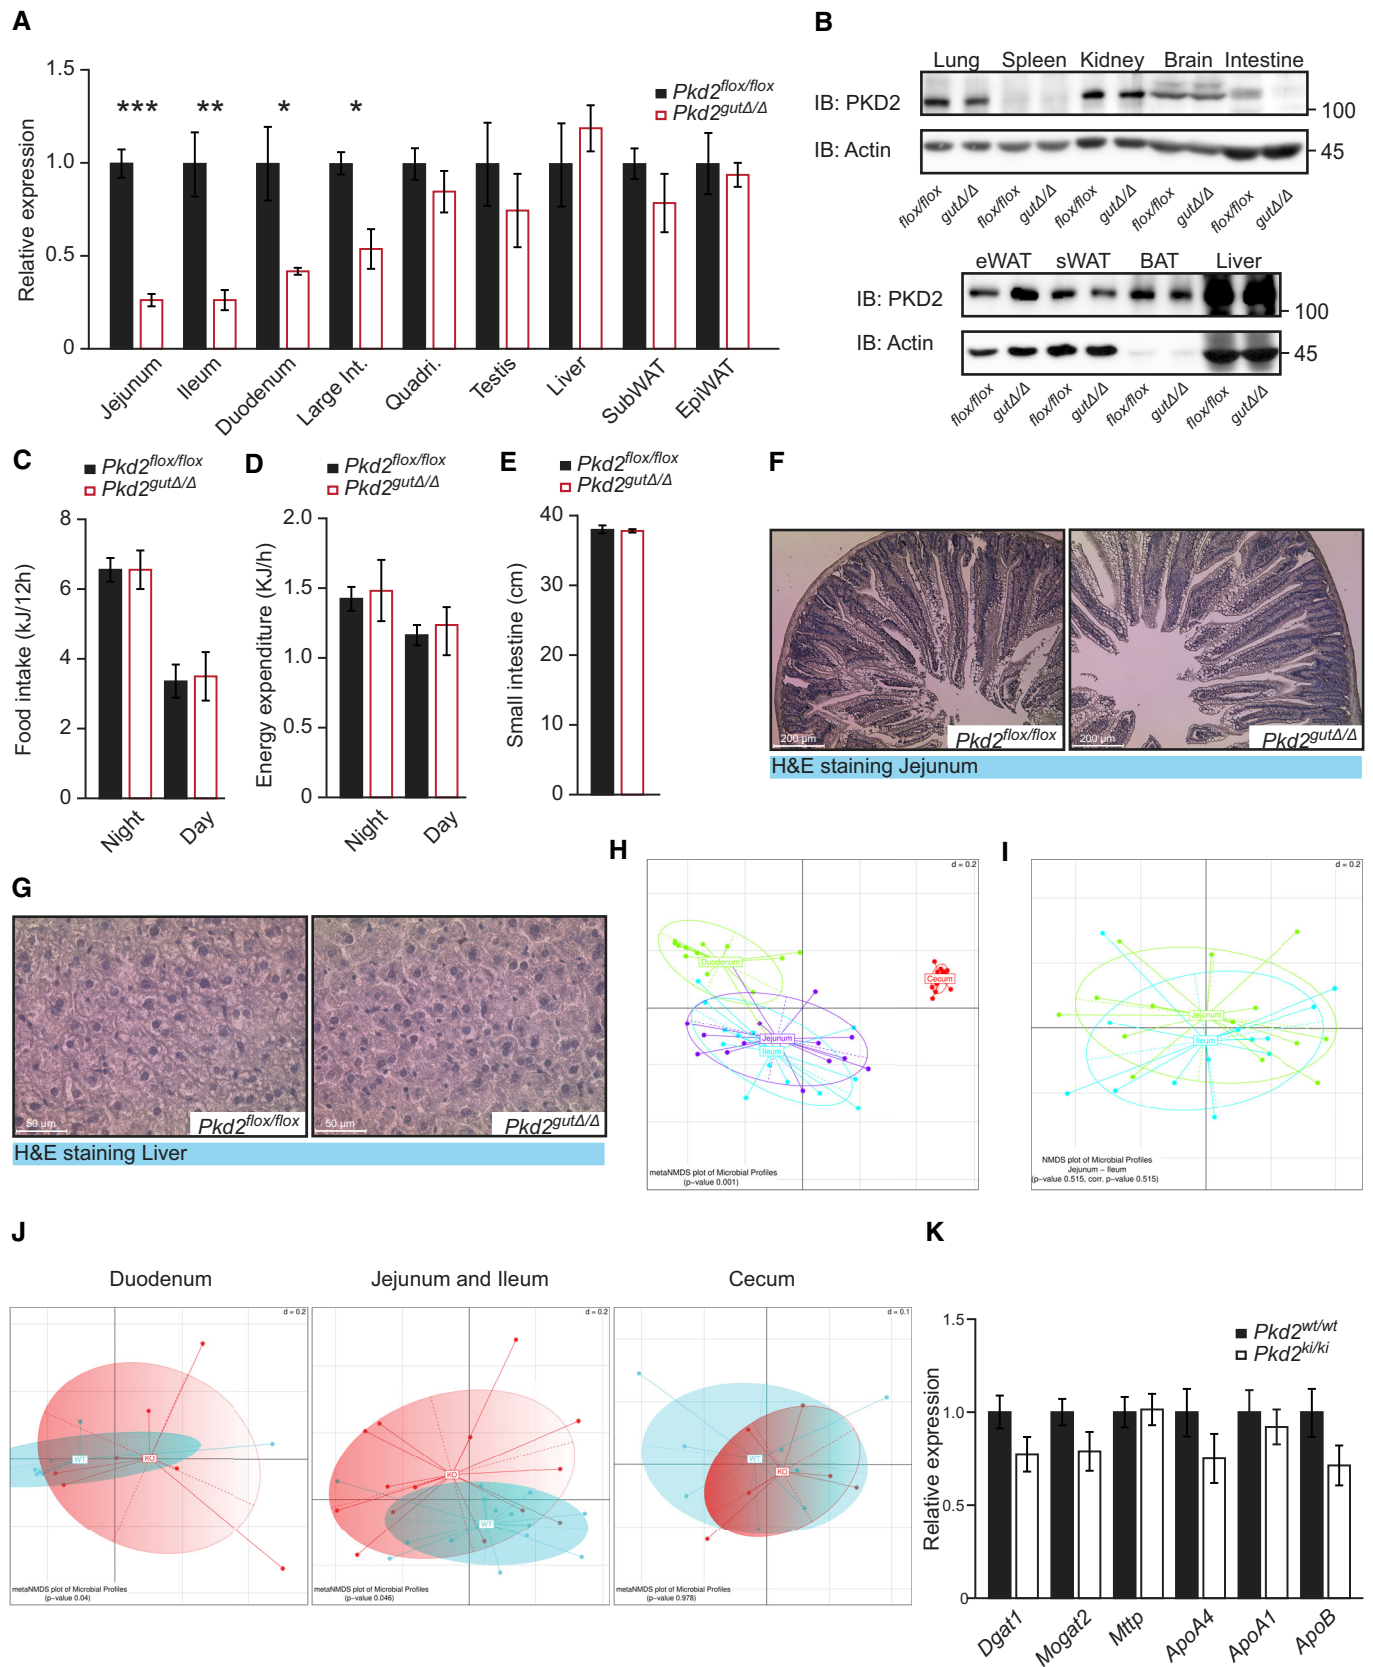

Figure EV4.



**Figure EV5. Oral dosing of PKD inhibitor (CRT0066101, 10 mg/kg of body weight) does not affect PKD activity in the liver or adipose tissue - Related to Figs 6 and 7.**

- A Western blot and quantification of phosphorylated PKD (S916/S876) in liver of male C57BL/6 mice in HFD which received CRT0066101 or water (control) for 13 weeks.  $n = 3$ .
- B Western blot and quantification of phosphorylated PKD (S916/S876) in EpiWAT of male C57BL/6 mice fed HFD which received CRT0066101 or water (control) for 13 weeks.  $n = 3$ .
- C–E Energy intake (C), energy expenditure (D), and activity (E) of male C57BL/6 mice which received CRT0066101 or water (control). Measurements after 7 weeks of treatment and HFD.  $n = 4$ .
- F Insulin levels of male C57BL/6 mice fed with HFD which received CRT0066101 or water (control) for 13 weeks. Samples taken after 4 h fasting and 1-h refeeding.  $n = 6$  for control and  $n = 5$  for CRT0066101.
- G Alanine aminotransferase (ALT) and aspartate aminotransferase (AST) levels in serum of male C57BL/6 mice fed HFD which received CRT0066101 or water (control) for 13 weeks.  $n = 6$  for control and  $n = 5$  for CRT0066101.
- H Triglyceride content in the liver of male C57BL/6 mice fed HFD which received CRT0066101 or water (control) for 13 weeks. Relative to control.  $n = 6$  for control and  $n = 5$  for CRT0066101.
- I Representative H&E pictures of brown adipose tissue (BAT) of male C57BL/6 mice in HFD which received CRT0066101 or water (control) for 13 weeks.
- J Intestinal permeability measured by dextran gavage of mice in Fig 7A.  $n = 8$ .
- K Anthropometric, metabolic, and biochemical data from human female patients in Fig 7F–I.  $n = 7$ .

Data information: Data presented as average  $\pm$  SEM, \* $P \leq 0.05$ . Significances were assessed by using a two-tailed Student's *t*-test for independent groups.

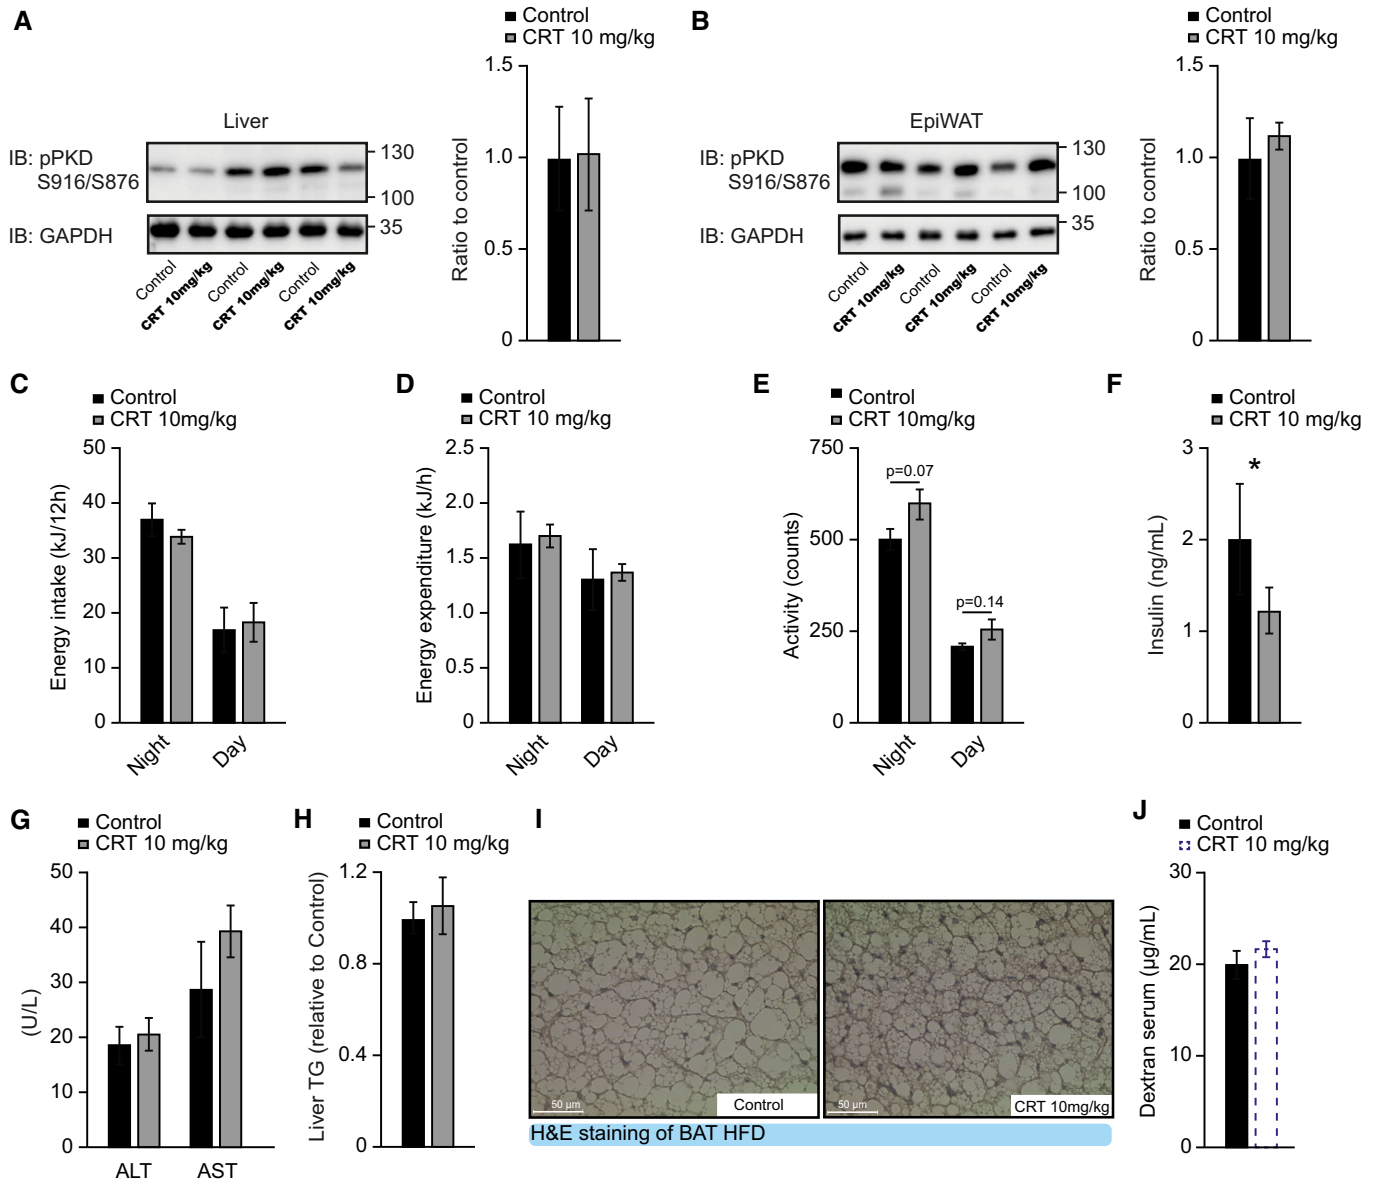

**K**

| Patient        | Weight (kg) | Height (cm) | BMI (kg/m <sup>2</sup> ) | T2D | Fasting glucose (mg/dL) | Cholesterol (mg/dL) | LDL (mg/dL) | HDL (mg/dL) | HbA1c (%) | Triglycerides (mg/dL) | pPKD/GAPDH (relative to patient 1) |
|----------------|-------------|-------------|--------------------------|-----|-------------------------|---------------------|-------------|-------------|-----------|-----------------------|------------------------------------|
| 1              | 158         | 175         | 51.7                     | No  | 90                      | 181                 | 107         | 58          | 5.3       | 79                    | 1                                  |
| 2              | 128         | 161         | 49.6                     | No  | 99                      | 221                 | 127         | 70          | 5.6       | 122                   | 0.52                               |
| 3              | 112         | 162         | 42.7                     | No  | 97                      | 210                 | 137         | 46          | 6.1       | 136                   | 0.85                               |
| 4 <sup>a</sup> | 127         | 168         | 45                       | No  | 92                      | 174                 | 93          | 53          | 5.3       | 138                   | 0.86                               |
| 5              | 158         | 171         | 54                       | No  | 85                      | 149                 | 80          | 40          | 6.1       | 143                   | 1.05                               |
| 6 <sup>b</sup> | 137         | 170         | 47.4                     | Yes | 86                      | 269                 | 181         | 40          | 6.2       | 238                   | 1.28                               |
| 7 <sup>b</sup> | 122         | 163         | 45.9                     | Yes | 95                      | 165                 | 63          | 44          | 6.8       | 291                   | 1.84                               |

<sup>a</sup> Medicated with metformin for PCOS

<sup>b</sup> Medicated with metformin for T2D

Figure EV5.
