# Supplementary material for: Protein Kinase D2 drives chylomicron‐mediated lipid transport in the intestine and promotes obesity
Source: PubMed Central journal article supplement (PMC8103097; doi:10.15252/emmm.202013548), 2021-05-05

Source data Fig 3

Fig 3A

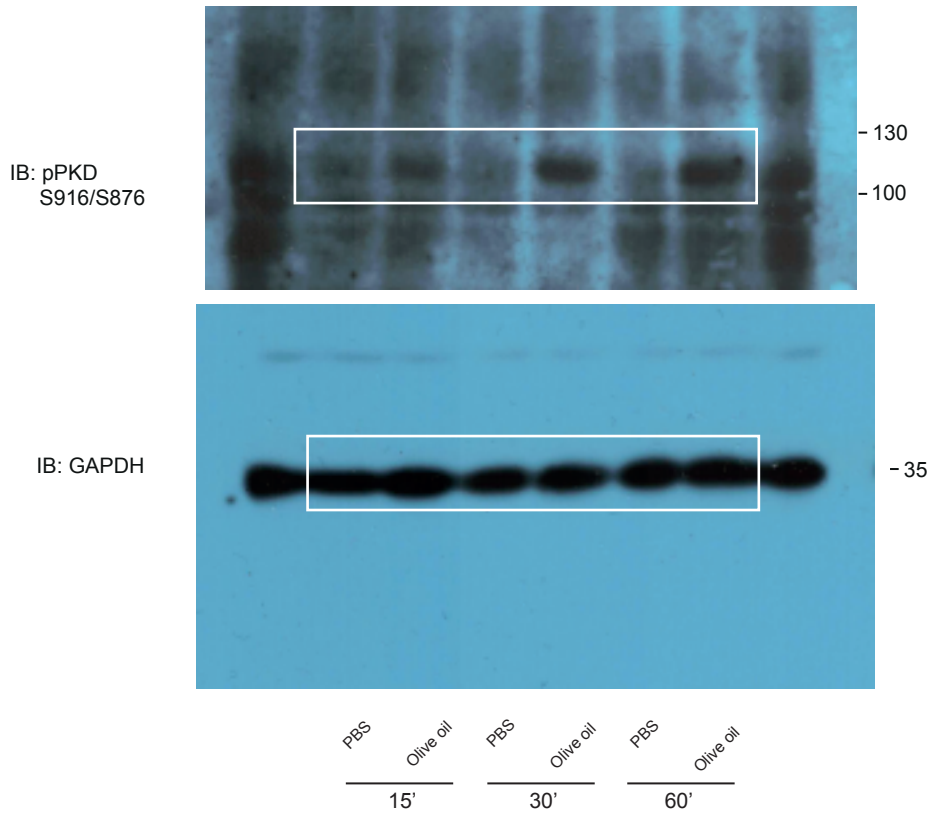

Fig 3D up

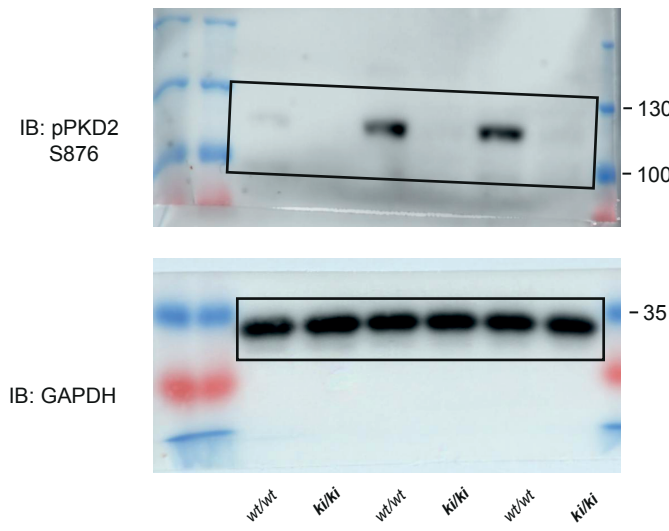

Fig 3D low

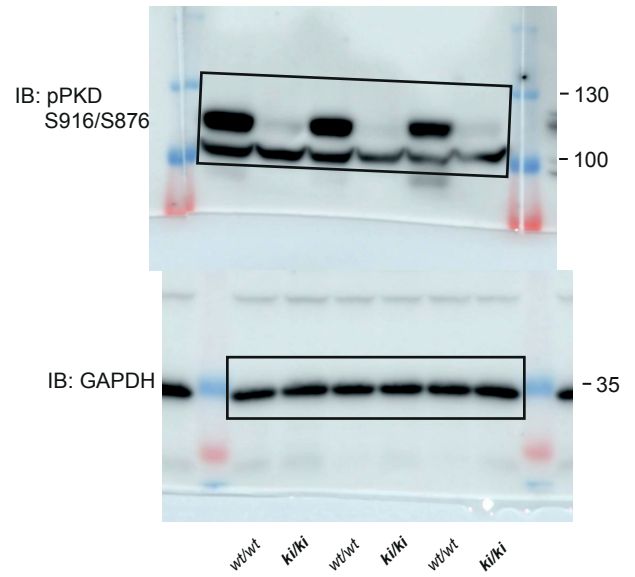

Fig 3E

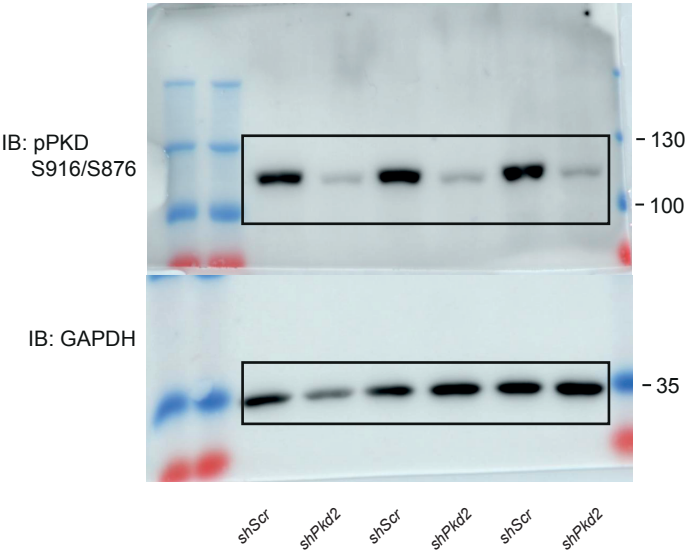

Supplement: EMMM-13-e13548-s002.pdf [file EMMM-13-e13548-s002.pdf]
