# Supplementary material for: Protein Kinase D2 drives chylomicron‐mediated lipid transport in the intestine and promotes obesity
Source: PubMed Central journal article supplement (PMC8103097; doi:10.15252/emmm.202013548), 2021-05-05
Supplement: EMMM-13-e13548-s003.pdf [file EMMM-13-e13548-s003.pdf]

## **Appendix**

### **Table of content**

**Appendix Table S1. List of Primers**

**Appendix Table S2. Key Resources**

**Appendix Table S3. p-values for each experiment**

**Appendix Table S1. List of Primers**

| <b>Gene</b>                        | <b>Forward (5'-3')</b>                      | <b>Reverse (5'-3')</b>                         |
|------------------------------------|---------------------------------------------|------------------------------------------------|
| <i>Pnlip</i>                       | CTGGGAGCAGTAGCTGGAAG                        | AGCGGGTGTGATCTGTGC                             |
| <i>Clps</i>                        | GAACAGTATGCAGTGTAAAGAGCA                    | GCAGATGCCATAGTTGGTGTG                          |
| <i>Cyp7a1</i>                      | ATCAAAGAGCGCTGTCTGGGT                       | GCGTTAGATATCCGGCTCAAAC                         |
| <i>Cyp8b1</i>                      | CTAGGGCCTAAAGGTTTCGAGT                      | GTAGCCGAATAAGCTCAGGAAG                         |
| <i>Abcg5</i>                       | AGGGCCTCACATCAACAGAG                        | GCTGACGCTGTAGGACACAT                           |
| <i>Abcg8</i>                       | CTGTGGAATGGGACTGTACTTC                      | GTTGGACTGACCACTGTAGGT                          |
| <i>Ehhadh</i>                      | ATGGCTGAGTATCTGAGGCTG                       | GGTCCAAACTAGCTTTCTGGAG                         |
| <i>Acaa1a</i>                      | TCTCCAGGACGTGAGGCTAAA                       | CGCTCAGAAATTGGGCGATG                           |
| <i>Cd36</i>                        | ATGGGCTGTGATCGGAAC                          | GTCTTCCCAATAAGCATGTCTCC                        |
| <i>Bacs</i>                        | TCTATGGCCTAAAGTTCAGGCG                      | CTTGCCGCTCTAAAGCATCC                           |
| <i>Baat</i>                        | GGAAACCTGTTAGTTCTCAGGC                      | GTGGACCCCATATAGTCTCC                           |
| <i>Taat</i>                        | GCACACGGCCTGAAGATGA                         | ATTTTTGTAGCAGAGGTACGGG                         |
| <i>Csad</i>                        | CCAGGACGTGTTTGGGATTGT                       | ACCAGTCTTGACACTGTAGTGA                         |
| <i>Asbt</i>                        | GTCTGTCCCCCAAATGCAACT                       | CACCCCATAGAAAACATCACCA                         |
| <i>Osta</i>                        | AGGCAGGACTCATATCAAACCTTG                    | TGAGGGCTATGTCCACTGGG                           |
| <i>Ostb</i>                        | AGATGCGGCTCCTTGGAAATTA                      | TGGCTGCTTCTTTCGATTTCTG                         |
| <i>Pppara</i>                      | AACATCGAGTGTCTGAATATGTGG                    | CCGAATAGTTCGCCGAAAGAA                          |
| <i>Acadl</i>                       | TCTTTTCTCGGAGCATGACA                        | GACCTCTACTCACTTCTCCAG                          |
| <i>Fabp4</i>                       | GGATGG444GTCGACCACAA                        | TGGAAGTCACGCCTTTCATA                           |
| <i>Fabp2</i>                       | GTGGAAAGTAGACCCGGAACGA                      | CCATCCTGTGTGATTGTCAGTT                         |
| <i>Fatp4</i>                       | ACTGTTCTCCAAGCTAGTGCT                       | GATGAAGACCCGGATGAAACG                          |
| <i>Fatp2</i>                       | TCGTGGGACTGGTAGATTTTG                       | CGCGATGTGTTGAAAGAGTTT                          |
| <i>Pkd1</i>                        | GGGGGCATCTCGTTCAT                           | GTGCCGAAAAGCAGGATCTT                           |
| <i>Pkd2</i>                        | GCTGAGACACCTGCACTTCA                        | GGATCGGCTGATGCCAGTAA                           |
| <i>Pkd3</i>                        | GTCTGTCAAATGTATCTCTGCCA                     | GGTGAGTATGTGACTCTTCACTG                        |
| <i>Mtp1</i>                        | CTCTTGGCAGTGCTTTTTCTCT                      | GAGCTTGTATAGCCGCTCATT                          |
| <i>Mogat2</i>                      | TGGGAGCGCAGGTTACAGA                         | CAGGTGGCATAACAGGACGGA                          |
| <i>Dgat1</i>                       | GCGTACTTCCGAGACTACTT                        | GGGCCTTATGCCAGGAAACT                           |
| <i>Apoa4</i>                       | GCATCTAGCCCAGGAAACTG                        | ATGTATGGGGTCAGCTGGAG                           |
| <i>Apoa1</i>                       | GGCACGTATGGCAGCAAGAT                        | CCAAGGAGGAGGATTCAAACCTG                        |
| <i>ApoB</i>                        | AAGCACCTCCGAAAGTACGTG                       | CTCCAGCTCTACCTTACAGTTGA                        |
| <i>Ucp1</i>                        | AGGCTTCCAGTACCATTAGGT                       | CTGAGTGAGGCAAAGCTGATTT                         |
| <i>Cidea</i>                       | TGACATTTCATGGGATTGCAGAC                     | GGCCAGTTGTGATGACTAAGAC                         |
| <i>Bmp7</i>                        | ACGGACAGGGCTTCTCCTAC                        | ATGGTGGTATCGAGGGTGGAA                          |
| <i>Adrb3</i>                       | AGAAACGGCTCTCTGGCTTTG                       | TGGTTATGGTCTGTAGTCTCGG                         |
| <i>Prdm16</i>                      | CCACCAGCGAGGACTTCAC                         | GGAGGACTCTCGTAGCTCGAA                          |
| <i>Cidec</i>                       | ATGGACTACGCCATGAAGTCT                       | CGGTGCTAACACGACAGGG                            |
| <i>Pgc1a</i>                       | AGCGCCGTGTGATTTACGTT                        | CCGCAGATTTACGGTGCATT                           |
| <i>Myh2</i>                        | AAAGCTCCAAGGACCCTCTT                        | AGCTCATGACTGCTGAACTCAC                         |
| <i>Ckm</i>                         | CAGCACAGACAGACACTCAGG                       | GAACCTGTTGTGGGTGTTGC                           |
| <i>Mck</i>                         | GCAAGCACCCCAAGTTTGA                         | ACCTGTGCCGCGCTTCT                              |
| <i>Slc6a8</i>                      | TGCATATCTCCAAGGTGGCAG                       | CTACAAACTGGCTGTCCAGA                           |
| <i>Slc27a2</i>                     | TCCTCCAAGATGTGCGGTACT                       | TAGGTGAGCGTCTCGTCTCG                           |
| <i>Ucp3</i>                        | CTGCACCGCCAGATGAGTTT                        | ATCATGGCTTCAAATCGGACC                          |
| <i>Myh1</i>                        | TCTGCAGACGGAGTCAGGT                         | TTGAGTGAATGCCTGTTTGC                           |
| <b>Genotyping</b>                  | <b>Forward (5'-3')</b>                      | <b>Reverse (5'-3')</b>                         |
| <i>Pkd2<sup>ki/ki</sup></i>        | AGTGGCACGTTCCCCTTCAATG                      | CTTTGCCCAATCCCTTACAGCCT                        |
| <i>Vil-Cre/WT</i>                  | GCCTTCTCCTCTAGGCTCGT                        | TATAGGGCAGAGCTGGAG GA                          |
| <i>Vil-Cre/Tg</i>                  | GCCTTCTCCTCTAGGCTCGT                        | AGGCAAATTTTGGTGTACGG                           |
| <i>Pkd2-Flox</i>                   | TGAAGGAAGTGTCTTGGGAGTCCCTGC<br>TGTTTTAATAGC | TGTCTAGGAGGGGACATAACGAACCT<br>GAGGAAACGGATCGGC |
| <b>Absolute<br/>quantification</b> | <b>Forward (5'-3')</b>                      | <b>Reverse (5'-3')</b>                         |
| <i>Pkd1</i>                        | TTTAACTCCCGTTGGAGCGA                        | CACTGTTGTTTGGTGGGGAAC                          |
| <i>Pkd2</i>                        | ATGTCACCTACTTTGTGGGCG                       | TGGGCGCATCTTGGAGGATA                           |
| <i>Pkd3</i>                        | AGGCAGTAACCCACACTGTTT                       | TCTGCGCCACATCTAGTCCC                           |

## Appendix Table S2. Key Resources

| REAGENT or RESOURCE                                          | SOURCE                    | IDENTIFIER                           |
|--------------------------------------------------------------|---------------------------|--------------------------------------|
| <b>Antibodies/dilution</b>                                   |                           |                                      |
| Rabbit anti-GAPDH 1:20000                                    | Sigma-Aldrich             | Cat# G9545,<br>RRID:AB_796208        |
| Rabbit Anti-APOA4/Apo-AIV 1:1000                             | Abcam                     | Cat# AB_231660                       |
| Mouse anti-apolipoprotein A4 1:1000                          | Cell Signaling Technology | Cat# 5700,<br>RRID:AB_10859038       |
| Rabbit anti-apolipoproteinB 1:1000                           | Proteintech               | Cat# 20578-1-AP,<br>RRID:AB_10732938 |
| Rabbit anti-apolipoprotein A1 1:1000                         | Abcam                     | Cat# ab20453,<br>RRID:AB_445592      |
| Rabbit Anti-MOGAT2 1:1000                                    | Abcam                     | Cat# ab63156,<br>RRID:AB_956147      |
| Rabbit Anti-DGAT1 1:1000                                     | Abcam                     | Cat# ab54037,<br>RRID:AB_869453      |
| Rabbit Anti-MTTP 1:1000                                      | Abcam                     | Cat# ab63467,<br>RRID:AB_10672035    |
| Rabbit Anti-PKD3/PKC, clone (D57E6) 1:1000                   | Cell Signaling Technology | Cat# 5655,<br>RRID:AB_10695917       |
| Rabbit Anti-Protein Kinase D2, clone (EP1495Y) 1:1000        | Abcam                     | Cat# ab51250,<br>RRID:AB_882058      |
| Rabbit Anti-Protein Kinase D2, clone (D1A7) 1:1000           | Cell Signaling Technology | Cat# 8188,<br>RRID:AB_10829368       |
| Rabbit Anti-PKD/PKC $\mu$ 1:1000                             | Cell Signaling Technology | Cat# 2052<br>RRID:AB_2800149         |
| Rabbit Anti-Phospho-PKD/PKC $\mu$ (Ser744/748) 1:1000        | Cell Signaling Technology | Cat# 2054<br>RRID:AB_2172539         |
| Rabbit Anti-Phospho-PKD/PKC $\mu$ (Ser916) 1:1000            | Cell Signaling Technology | Cat# 2051<br>RRID:AB_330841          |
| Rabbit Anti-PKD2 (phospho S876), clone (EP1496Y) 1:1000      | Abcam                     | Cat# ab51251<br>RRID:AB_882060       |
| Rabbit Anti-Phospho-Akt Substrate (RXXS*/T*) (110B7E) 1:1000 | Cell Signaling Technology | Cat# 9614<br>RRID:AB_331810          |
| Mouse anti- $\beta$ -actin 1:10000                           | Sigma-Aldrich             | Cat# A5441<br>RRID:AB_476744         |
| Rabbit anti- $\alpha$ -Tubulin 1:5000                        | Cell Signaling Technology | Cat# 2144<br>RRID:AB_2210548         |
| Rabbit anti-Pancreatic Lipase 1:2000                         | Abcam                     | Cat# ab2287737<br>RRID:AB_2889168    |
| Goat Anti-Villin, clone (C-19) 1:200                         | Santa Cruz Biotechnology  | Cat# sc-7672,<br>RRID:AB_2215973     |
| Rabbit Anti-Chromogranin A, clone (H-300) 1:200              | Santa Cruz Biotechnology  | Cat# sc-13090,<br>RRID:AB_2080982    |
| Mouse Anti-E-Cadherin 1:100                                  | BD Biosciences            | Cat# 610182,<br>RRID:AB_397581       |
| Gpig Anti-Insulin 1:180                                      | Abcam                     | Cat# ab7842<br>RRID:AB_306130        |
| Goat anti-gpig Alexa Flour® 594 1:200                        | Thermo Fisher Scientific  | Cat# A11076<br>RRID:AB_141930        |
| Donkey anti-mouse Alexa Flour® 555 1:200                     | Thermo Fisher Scientific  | Cat# A-31570,<br>RRID:AB_2536180     |
| Donkey anti-rabbit Alexa Flour® 647 1:200                    | Thermo Fisher Scientific  | Cat# A-31573,<br>RRID:AB_2536183     |
| Donkey anti-Goat IgG Alexa Flour® 555 1:200                  | Thermo Fisher Scientific  | Cat# A-21447,<br>RRID:AB_2535864     |
| <b>Bacterial and Virus Strains</b>                           |                           |                                      |
| Plasmid: shPkd2. pLKO.1_ MISSION                             | Sigma-Aldrich             | This paper                           |

|                                                                                                             |                          |                                                             |
|-------------------------------------------------------------------------------------------------------------|--------------------------|-------------------------------------------------------------|
| Plasmid: shPkd3. pLKO.1_ MISSION                                                                            | Sigma-Aldrich            | This paper                                                  |
| Plasmid: pLKO.1-puro scramble Vector Control_ MISSION                                                       | Sigma-Aldrich            | Cat#: SHC001                                                |
| Plasmid: pLV[shRNA]-Hygro-U6>Scramble_shRNA                                                                 | Vector Builder           | Cat #: Ecoli (VB010000-0006zba)                             |
| Plasmid: pLV[shRNA]-Hygro-U6>hPRKD2                                                                         | Vector Builder           | Cat #: Ecoli (VB201013-1031xdu)                             |
| Plasmid: psPAX                                                                                              | Addgene                  | RRID:Addgene_12260                                          |
| Plasmid: pMD2.G                                                                                             | Addgene                  | RRID:Addgene_12259                                          |
| <b>Chemicals, Peptides, and Recombinant Proteins</b>                                                        |                          |                                                             |
| Recombinant human PKD2 protein                                                                              | Abcam                    | Cat#: ab60875                                               |
| Recombinant Human APOA4/Apo-AIV protein                                                                     | Abcam                    | Cat#: ab132653                                              |
| Pkd inhibitor CRT 0066101                                                                                   | Tocris                   | Cat#: 4975                                                  |
| Matrigel, Phenol Red-free                                                                                   | Corning                  | Cat#: 356231                                                |
| Fluorescein Isothiocyanate Dextran                                                                          | Sigma-Aldrich            | Cat#: 46944                                                 |
| Insulin solution human                                                                                      | Sigma-Aldrich            | Cat#: I9278                                                 |
| Triglyceride Reagent                                                                                        | Sigma-Aldrich            | Cat#: T2449                                                 |
| Taurocholic acid sodium salt                                                                                | Sigma-Aldrich            | Cat#: T4009                                                 |
| Oleic acid                                                                                                  | Sigma-Aldrich            | Cat#: O1383                                                 |
| Fatty acids-free BSA                                                                                        | Sigma-Aldrich            | Cat#: <b>A7030</b>                                          |
| <sup>14</sup> C-palmitate                                                                                   | Perkin Elmer             | Lot#: 2252435                                               |
| Fluoromount-G™ with DAPI                                                                                    | Thermo Fisher Scientific | Cat#: 00-4959-52                                            |
| <b>Critical Commercial Assays</b>                                                                           |                          |                                                             |
| Free Glycerol Determination                                                                                 | Sigma-Aldrich            | Cat#: F6428                                                 |
| NEFA-reagents                                                                                               | WAKO                     | Cat#: 999-34691                                             |
| Ultra Sensitive Mouse Insulin ELISA Kit                                                                     | Crystal Chem             | Cat#: 90080                                                 |
| <b>Experimental Models: Cell Lines</b>                                                                      |                          |                                                             |
| Caco-2 cells. Not tested for mycoplasma.                                                                    | ATCC                     | Cat# HTB-37, RRID:CVCL_0025                                 |
| HEK293T cells. Last tested for mycoplasma in August 2018.                                                   | ATCC                     | Cat# CRL-3216, RRID:CVCL_0063                               |
| <b>Experimental Models: Organisms/Strains</b>                                                               |                          |                                                             |
| Mouse: <i>Pkd2</i> <sup>S707A/S711A</sup>                                                                   | The Jackson Laboratory   | #017285                                                     |
| Mouse <i>Pkd2</i> <sup>Flox/Flox</sup>                                                                      | Lab. Professor Yamasaki  | N/A                                                         |
| Mouse: C57BL/6J                                                                                             | The Jackson Laboratory   | IMSR Cat# JAX:000664, RRID:IMSR_JAX:000664                  |
| Mouse: B6.Cg-Tg(Vil1-cre)1000Gum/J                                                                          | The Jackson Laboratory   | Cat# JAX:021504, RRID:IMSR_JAX:021504                       |
| <b>Oligonucleotides</b>                                                                                     |                          |                                                             |
| <i>Pkd2</i> shRNA lentivirus (Sequence 1)<br>CCGGCTTCTACGGCCTTTACGACAACCTCGAGTTG<br>TCGTAAAGGCCGTAGAAGTTTTT | Sigma-Aldrich            | SHCLNG-NM_016457<br>TRCN0000001948                          |
| <i>Pkd2</i> shRNA lentivirus (Sequence 2)<br>TCCAGAACAACACGACCAACAGATACTATAAGG<br>AAATTCCG                  | Vector Builder           | Cat #: Ecoli (VB201013-1031xdu)                             |
| <i>Pkd3</i> shRNA lentivirus<br>CCGGCACTTCATTATGGCTCCTAATCTCGAGATT<br>AGGAGCCATAATGAAGTGTTTTTTG             | Sigma-Aldrich            | SHCLNG-NM_005813<br>TRCN0000195275                          |
| Primers for qPCR and genotyping, see Appendix Table S1                                                      |                          |                                                             |
| <b>Software and Algorithms</b>                                                                              |                          |                                                             |
| Illustrator CS6                                                                                             | Adobe                    | <a href="https://www.adobe.com/">https://www.adobe.com/</a> |

**Appendix Table S3. p-values for each experiment**

| Figure |            | p-value | Figure |               | p-value | Figure |               | p-value   |
|--------|------------|---------|--------|---------------|---------|--------|---------------|-----------|
| 1A     | 10         | 0,0054  | 4B     |               | 0,03931 | 6H     | 90            | 0,002     |
|        | 12         | 0,00059 | 4C     | 1             | 0,02639 | 6I     | 0             | 0,0020    |
|        | 14         | 4,2E-05 |        | 2             | 0,04123 |        | 30            | 0,0236    |
|        | 16         | 0,00035 | 4D     | 6             | 0,01279 |        | 60            | 0,0467    |
|        | 18         | 0,00033 |        | 8             | 0,00701 |        | 90            | 0,0452    |
|        | 20         | 0,00081 |        | 10            | 0,00193 | 7A     | 10            | 0,0049    |
|        | 22         | 0,00012 |        | 12            | 0,00187 |        | 12            | 0,0015    |
| 1B     | Fat mass   | 0,0034  |        | 14            | 0,00027 |        | 14            | 0,0006    |
| 1C     | BAT        | 0,00273 |        | 16            | 0,00051 |        | 16            | 0,0006    |
|        | EpiWAT     | 0,0008  | 4E     | Fat mass      | 0,00661 |        | 18            | 0,0009    |
|        | SubWAT     | 0,00092 | 4F     | 0             | 0,00284 | 7B     | SubWAT        | 0,0041    |
| 1D     | EpiWAT     | 0,00066 |        | 30            | 0,04949 |        | EpiWAT        | 0,0166    |
|        | SubWAT     | 0,0062  |        | 60            | 0,04251 |        | BAT           | 0,0219    |
| 1F     |            | 0,00659 |        | 90            | 0,03478 | 7C     | Fat mass      | 0,0059    |
| 1G     | 15         | 0,00681 | 4G     |               | 0,00706 | 7D     | 0             | 0,0288    |
|        | 30         | 0,00049 | 4H     |               | 0,01788 |        | 15            | 0,0422    |
|        | 60         | 0,00091 | 4I     | Duodenum      | 0,0379  |        | 30            | 0,0042    |
|        | 90         | 0,00063 | 4J     |               | 0,047   |        | 60            | 0,0070    |
|        | 120        | 0,00024 | 5B     |               | 0,02897 |        | 90            | 0,0033    |
| 1H     | 60         | 0,0098  | 5C     |               | 0,04228 |        | 120           | 0,0091    |
|        | 90         | 0,01506 | 5D     | APOA4         | 0,00457 | 7E     | 15            | 0,0439    |
|        | 120        | 0,00693 | 5G     | 50            | 0,0409  |        | 30            | 0,0065    |
| 1I     |            | 0,0451  |        | 151-200       | 0,0163  |        | 60            | 0,0366    |
| 1J     |            | 0,01679 |        | 201-250       | 0,0000  | 7G     |               | <0,02     |
| 2B     |            | 0,00685 |        | 250           | 0,0030  | 7H     |               | <0,05     |
| 2C     |            | 0,0052  | 6A     | to 3uM        | 0,04984 | EV1A   | Prdm16        | 0,13      |
| 2D     |            | 0,0021  |        | to 5uM        | 0,00441 |        | Pgc1a         | 0,18      |
| 2E     |            | 1,5E-05 | 6B     | no CRT        | 0,00644 |        | Slc6a8        | 0,0408    |
| 2F     |            | 0,00663 |        | shScr +/- CRT | 0,00503 | EV1H   |               | 0,0035    |
| 2G     |            | 6E-05   | 6C     |               | 0,11    | EV2E   | Cyp7a1        | 0,0459    |
| 2H     |            | 8,7E-07 | 6D     |               | 0,02782 | EV2K   | PKD2          | 0,0109    |
| 3B     | 2          | 0,00816 | 6E     | 1             | 0,0283  | EV4A   | Jejunum       | 2,916E-06 |
|        | 3          | 0,02613 |        | 2             | 0,0222  |        | Ileum         | 0,0094    |
| 3C     | 2          | 0,01402 | 6F     |               | 0,03034 |        | Duodenum      | 0,0282    |
| 3D     | pPKD upper | 0,00883 | 6G     | 7             | 0,0490  |        | Large Intest. | 0,0137    |
| 3E     |            | 0,01959 |        | 9             | 0,0075  | EV5E   | Night         | 0,0700    |
| 3G     | Release    | 0,003   |        | 11            | 0,0092  |        | Day           | 0,1400    |
| 3H     |            | 0,0005  |        | 13            | 0,0087  | EV5F   |               | 0,0241    |
| 4A     |            | 0,01664 | 6H     | 60            | 0,029   |        |               |           |

All the p-values were calculated with a two-tailed Student's t-test for independent groups. Except for:

4I that was calculated with a non-parametric Mann-Whitney U test

4J which was calculated with a Fisher's Exact test with adjustments for multiple testing using the Benjamini & Hochberg method

6A-B were calculated by one way ANOVA followed by the post hoc tukey test
