# Supplementary material for: Protein Kinase D2 drives chylomicron‐mediated lipid transport in the intestine and promotes obesity
Source: PubMed Central journal article supplement (PMC8103097; doi:10.15252/emmm.202013548), 2021-05-05

Source data Fig 5

Fig 5A

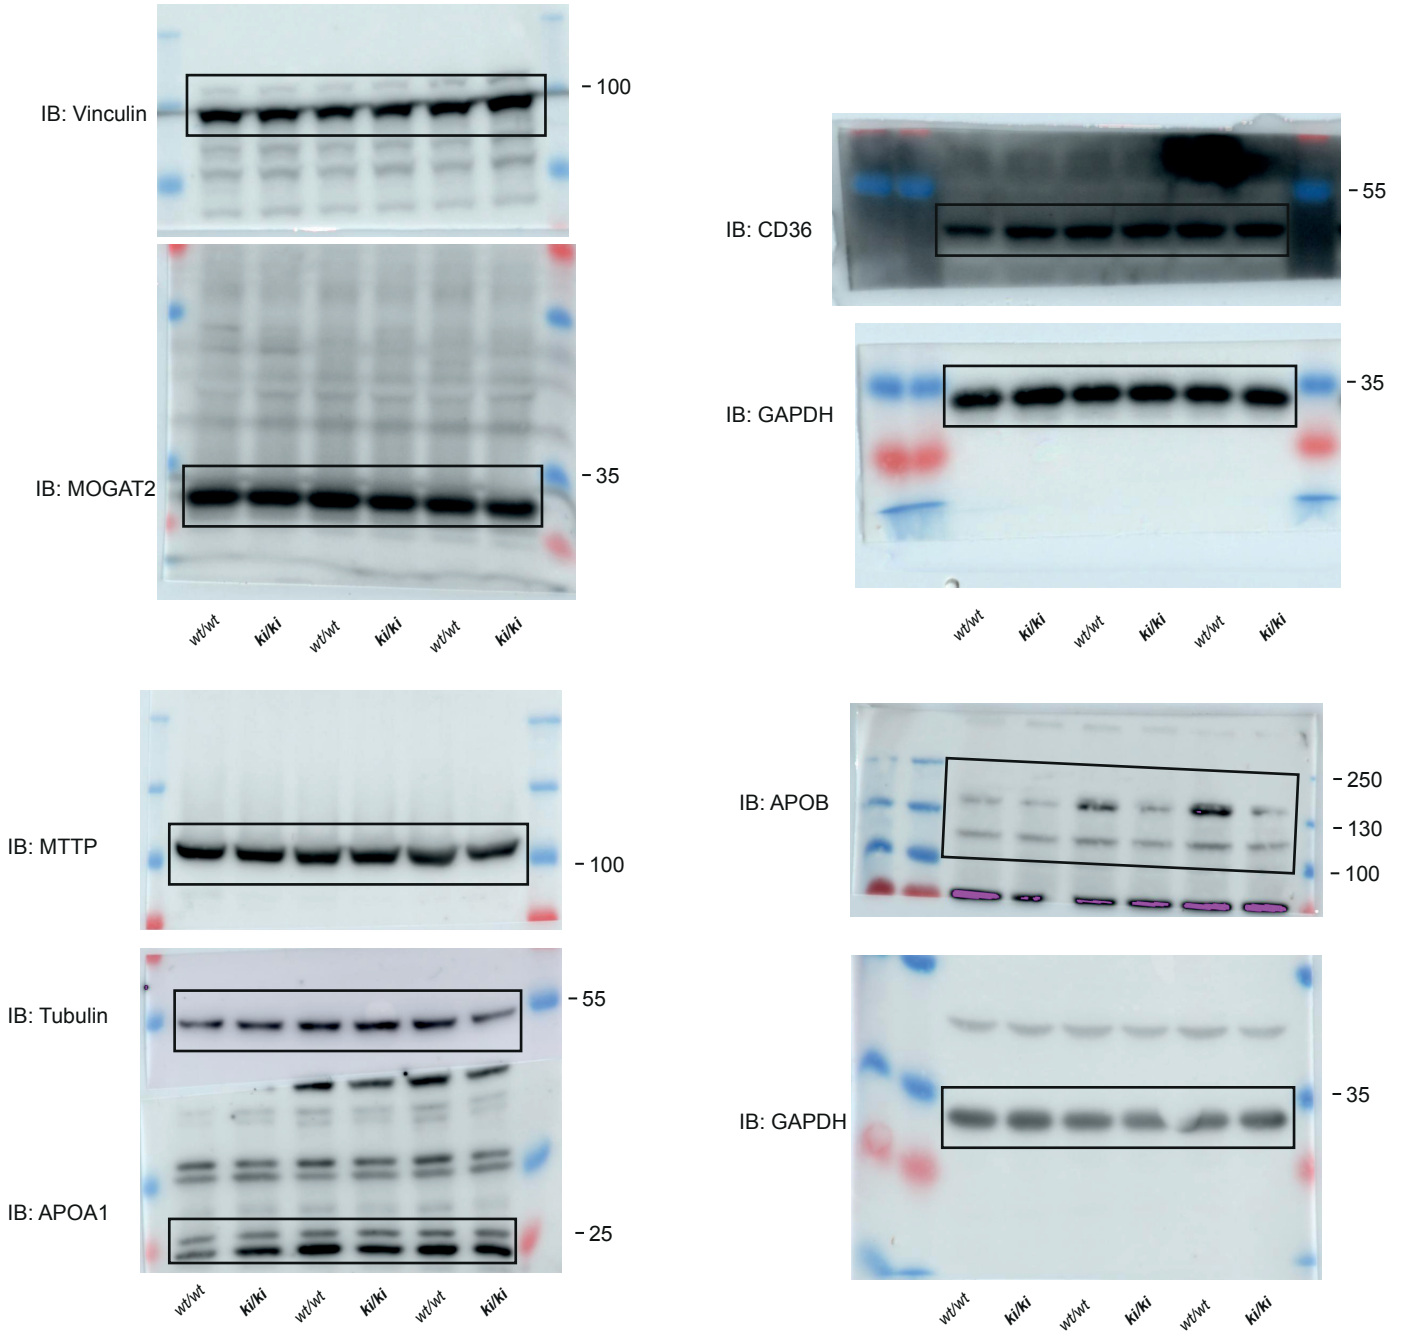

Source data Fig 5

Fig 5B

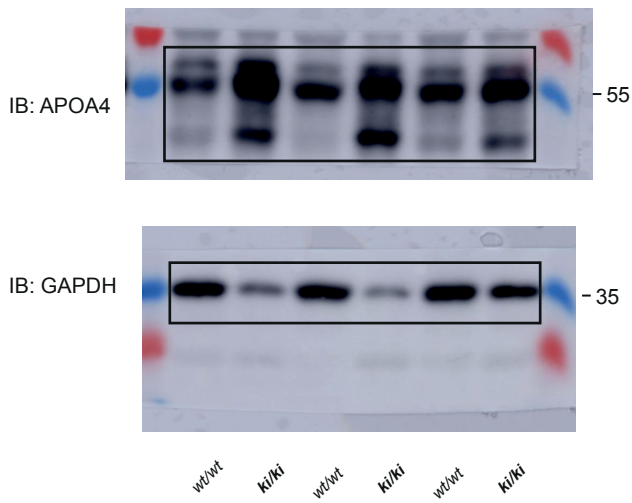

Fig 5C

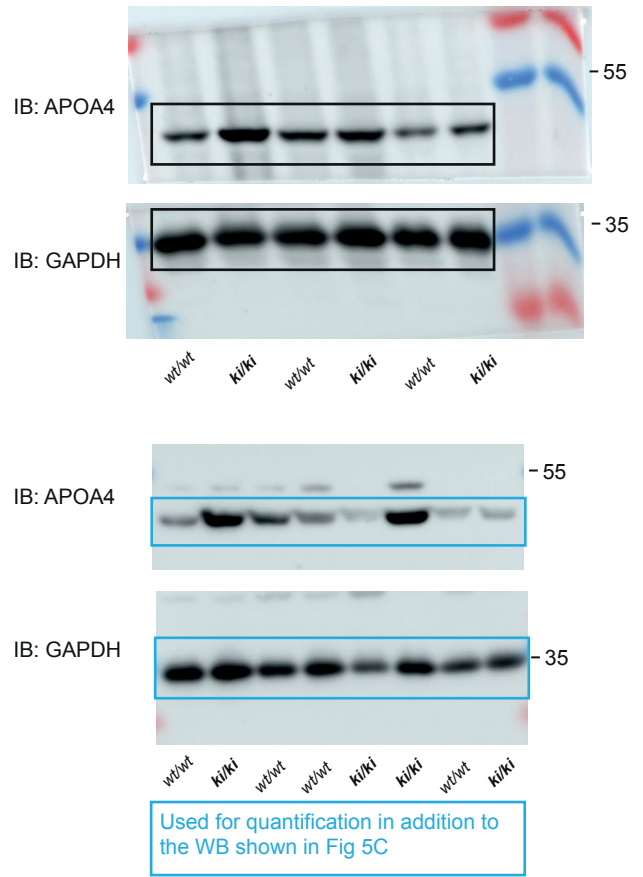

Fig 5D

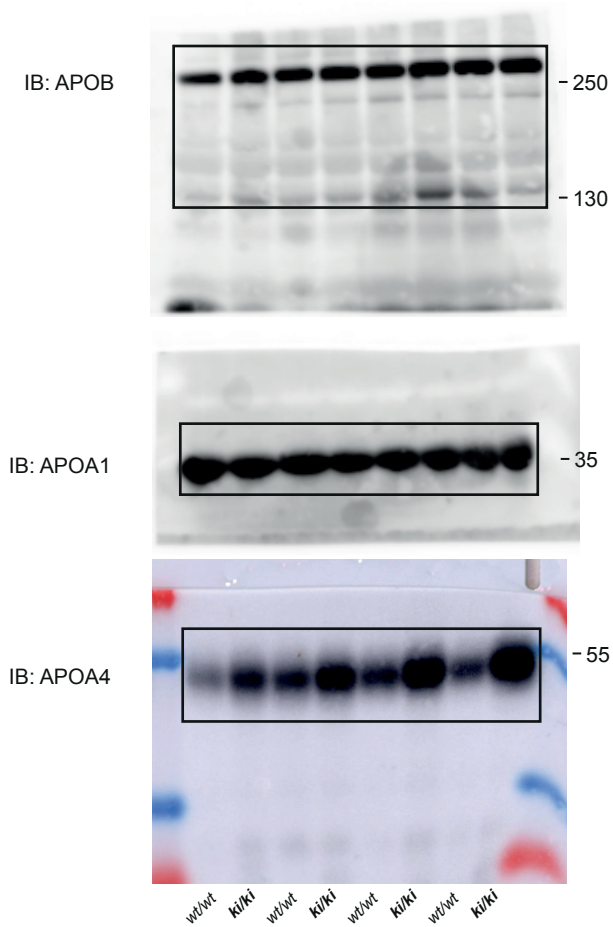

Fig 5E

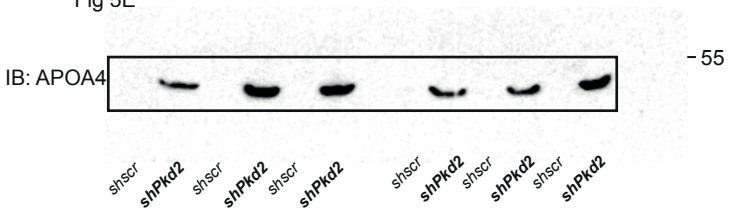

Fig 5H

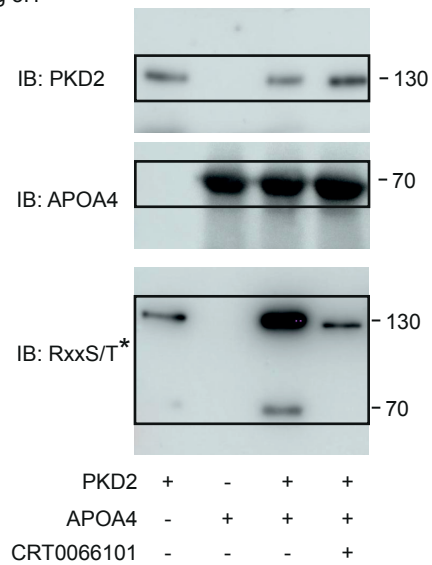

Supplement: EMMM-13-e13548-s006.pdf [file EMMM-13-e13548-s006.pdf]
