# Supplementary material for: Protein Kinase D2 drives chylomicron‐mediated lipid transport in the intestine and promotes obesity
Source: PubMed Central journal article supplement (PMC8103097; doi:10.15252/emmm.202013548), 2021-05-05

Source data Fig 6

Fig 6C

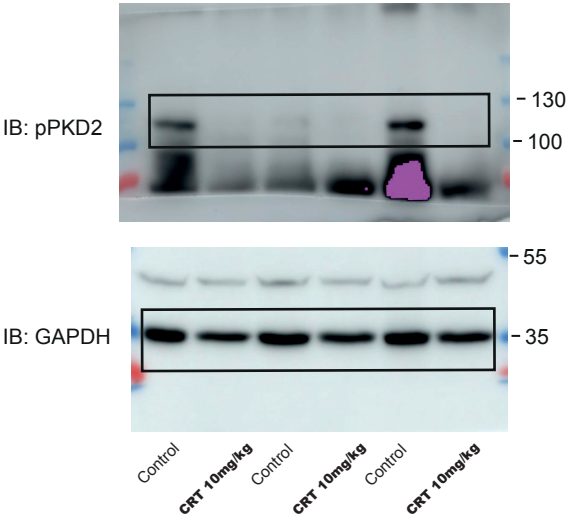

Fig 6F

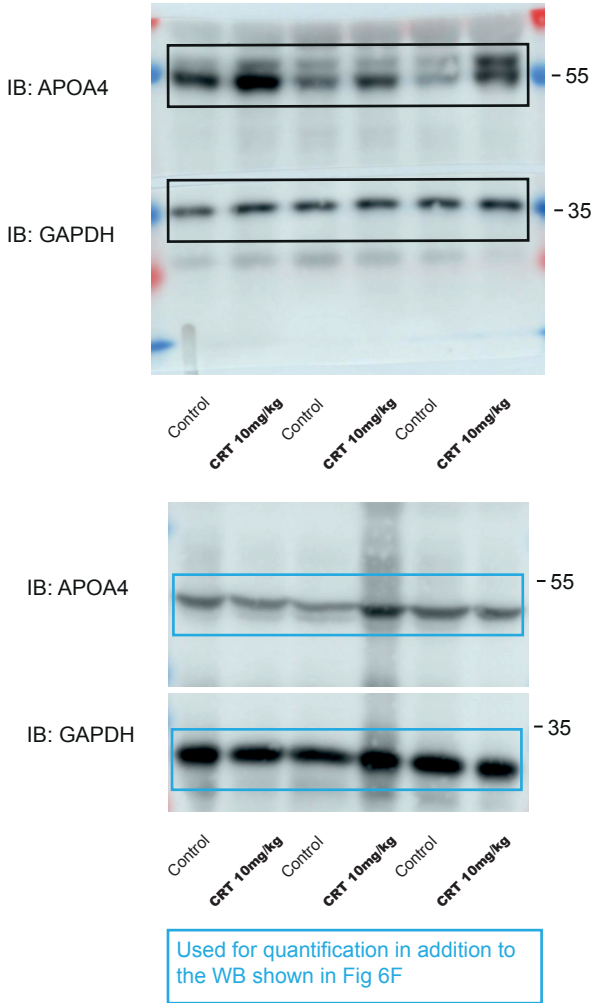

Supplement: EMMM-13-e13548-s007.pdf [file EMMM-13-e13548-s007.pdf]
